# Supplementary material for: Evaporation from Savanna and Agriculture in Semi-Arid West Africa
Source: Copernicus journal article supplement (doi:10.5194/hess-2016-672), 2017-01-16

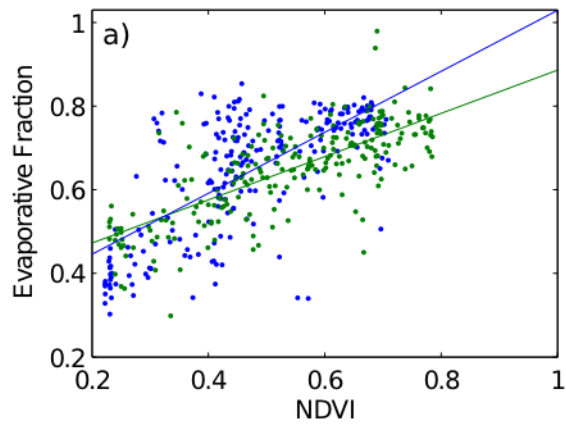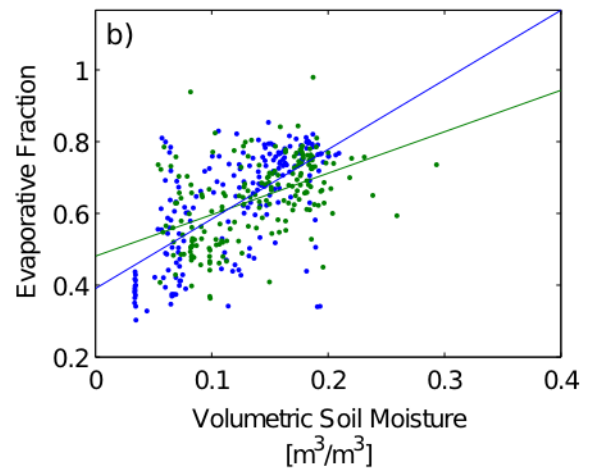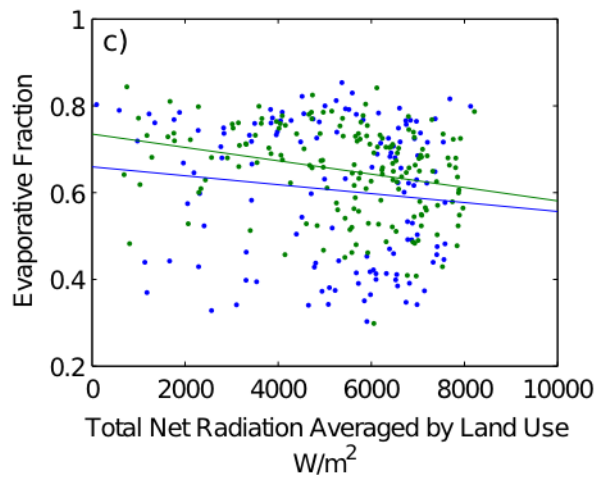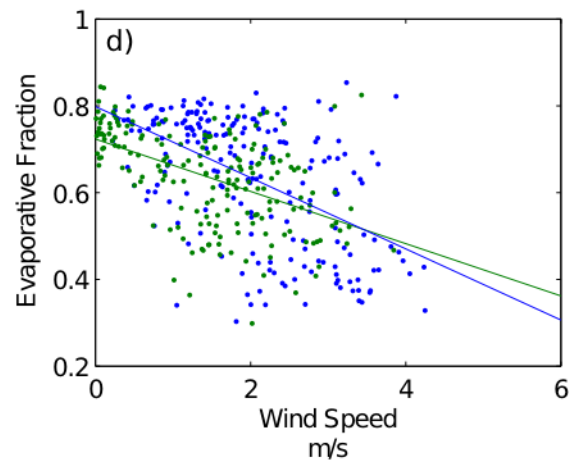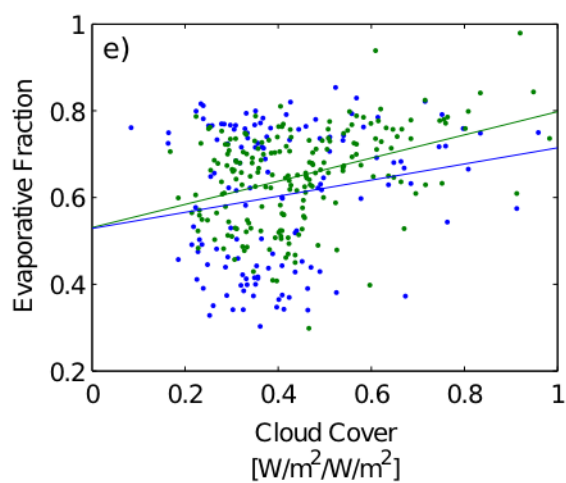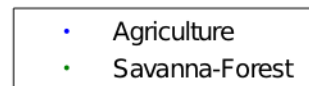

|                           | Evaporative Fraction |                |
|---------------------------|----------------------|----------------|
|                           | Agriculture          | Savanna-Forest |
| <u>Vegetation (NDVI)</u>  | 69.76                | 74.71          |
| <u>Soil Water content</u> | 64.63                | 48.33          |
| <u>Net Radiation</u>      | -6.88                | -13.33         |
| <u>Wind Speed</u>         | -51.85               | -43.07         |
| <u>Cloud Cover</u>        | 19.17                | 38.94          |

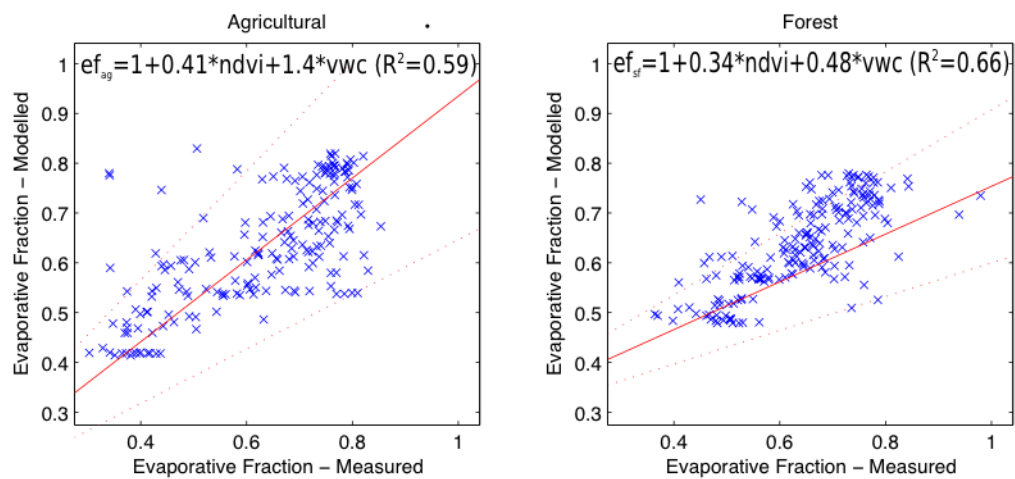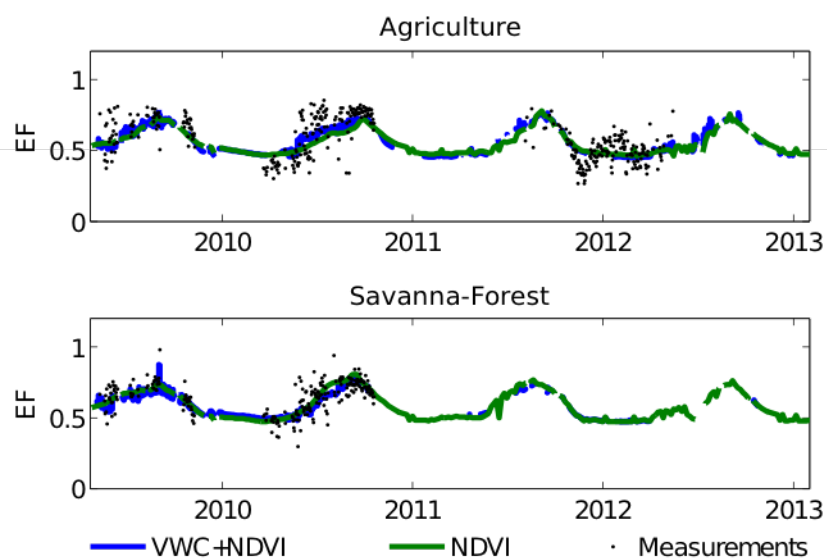

Supplement: Supplementary file [file hess-2016-672-AC1-supplement.zip]
